# Supplementary material
Source: Springer Nature journal article supplement (https://www.springermedizin.de/resource/supplementary/12904_2014_205_MOESM1_ESM.pdf/9517766)
Supplement: MOESM1 [file 9517766]

Consent (N=18)

- Early withdrawals:
  - Deceased (N=1)
  - Started own exercise (N=1)
  - Communication difficulties (N=1)

Start study (N=15)

- Late withdrawals:
  - Deceased (N=1)
  - Medical decline (N=3)
  - Intolerant of NMES (N=1)

End study (N=10)
